# Supplementary material for: Comparison of All-Cause Mortality Rates and Inequities Between Black and White Populations Across the 30 Most Populous US Cities
Source: PubMed Central journal article supplement (PMC9386890; doi:10.1001/jamanetworkopen.2020.32086), 2021-01-20
Supplement: jamanetwopen-e2032086-s001.pdf [file jamanetwopen-e2032086-s001.pdf]

## Supplemental Online Content

Benjamins MR, Silva A, Saiyed NS, De Maio FG. Comparison of all-cause mortality rates and inequities between Black and White populations across the 30 most populous US cities. *JAMA Netw Open*. 2021;4(12):e2032086. doi:10.1001/jamanetworkopen.2020.32086

**eTable 1.** Selected City-Level Sociodemographic Characteristics for the US and the 30 Largest US Cities

**eTable 2.** Age-Adjusted All-Cause Mortality Rates and Measures of Disparities Over 3 Time Periods (2010-2012, 2013-2015, and 2016-2018)

This supplemental material has been provided by the authors to give readers additional information about their work.

**eTable 1. Selected City-Level Sociodemographic Characteristics for the US and the 30 Largest US Cities**

| City, State          | Population  | Percent NH White | Percent NH Black | Percent Other <sup>1</sup> | Percent ≥65 Years | Median Age (in years) | Percent Male |
|----------------------|-------------|------------------|------------------|----------------------------|-------------------|-----------------------|--------------|
| <i>United States</i> | 318,558,162 | 61               | 12               | 27                         | 15                | 38                    | 49           |
| Austin, TX           | 907,779     | 49               | 7                | 44                         | 8                 | 32                    | 51           |
| Baltimore, MD        | 621,000     | 28               | 63               | 9                          | 12                | 35                    | 47           |
| Boston, MA           | 658,279     | 45               | 23               | 32                         | 11                | 32                    | 48           |
| Charlotte, NC        | 808,834     | 43               | 35               | 22                         | 10                | 34                    | 48           |
| Chicago, IL          | 2,714,017   | 32               | 31               | 37                         | 11                | 34                    | 49           |
| Columbus, OH         | 837,038     | 58               | 28               | 14                         | 9                 | 32                    | 49           |
| Dallas, TX           | 1,278,433   | 29               | 24               | 47                         | 10                | 33                    | 50           |
| Denver, CO           | 663,303     | 53               | 9                | 38                         | 11                | 34                    | 50           |
| Detroit, MI          | 683,443     | 10               | 79               | 11                         | 13                | 35                    | 47           |
| El Paso, TX          | 678,058     | 14               | 3                | 83                         | 12                | 33                    | 49           |
| Fort Worth, TX       | 815,930     | 41               | 19               | 40                         | 9                 | 32                    | 49           |
| Houston, TX          | 2,240,582   | 25               | 22               | 53                         | 10                | 33                    | 50           |
| Indianapolis, IN     | 846,674     | 57               | 28               | 15                         | 11                | 34                    | 48           |
| Jacksonville, FL     | 856,616     | 53               | 30               | 17                         | 13                | 36                    | 48           |
| Las Vegas, NV        | 613,295     | 46               | 11               | 43                         | 14                | 37                    | 50           |
| Los Angeles, CA      | 3,918,872   | 29               | 9                | 62                         | 12                | 35                    | 50           |
| Louisville, KY       | 611,573     | 67               | 23               | 10                         | 14                | 37                    | 48           |
| Memphis, TN          | 655,857     | 27               | 63               | 10                         | 11                | 34                    | 48           |
| Nashville, TN        | 643,771     | 56               | 28               | 16                         | 11                | 34                    | 48           |
| New York, NY         | 8,461,961   | 32               | 22               | 46                         | 13                | 36                    | 48           |
| Oklahoma City, OK    | 620,015     | 55               | 14               | 31                         | 12                | 34                    | 49           |
| Philadelphia, PA     | 1,559,938   | 35               | 42               | 23                         | 13                | 34                    | 47           |
| Phoenix, AZ          | 1,555,324   | 44               | 7                | 49                         | 10                | 33                    | 50           |
| Portland, OR         | 620,589     | 72               | 6                | 22                         | 12                | 37                    | 49           |
| San Antonio, TX      | 1,439,358   | 26               | 7                | 67                         | 11                | 33                    | 49           |
| San Diego, CA        | 1,374,812   | 43               | 6                | 51                         | 12                | 34                    | 50           |
| San Francisco, CA    | 850,282     | 41               | 5                | 54                         | 14                | 38                    | 51           |
| San Jose, CA         | 1,009,363   | 27               | 3                | 70                         | 11                | 36                    | 50           |
| Seattle, WA          | 668,849     | 66               | 7                | 27                         | 12                | 36                    | 50           |
| Washington, DC       | 659,009     | 36               | 47               | 17                         | 11                | 34                    | 47           |

Abbreviations: NH, non-Hispanic; HS, high school

Source: American Community Survey, Demographic and Housing Estimates, 2016. Downloaded from <https://data.census.gov/cedsci/r>, Table DP05.

<sup>1</sup>"Other" category includes all individuals not classified as NH Black or NH White. It was calculated by subtracting the Black and White population estimates from the total population estimates for the U.S. and each city.

**eTable 2. Age-Adjusted All-Cause Mortality Rates and Measures of Inequities Over 3 Time Periods (2010-2012, 2013-2015, and 2016-2018)**

| Location                  | 2010-2012            |                         |                         |                      |                |                      |                     |
|---------------------------|----------------------|-------------------------|-------------------------|----------------------|----------------|----------------------|---------------------|
|                           | Total Mortality Rate | NH Black Mortality Rate | NH White Mortality Rate | Other Mortality Rate | B:W Rate Ratio | Rate Ratio CI        | Excess Black Deaths |
| United States             | 769                  | 972                     | 778                     | 556                  | 1.25           | (1.247-1.252)        | 67257               |
| Austin, TX                | 740                  | 997                     | 735                     | 660                  | 1.36           | (1.28-1.44)          | 141                 |
| Baltimore, MD             | 1018                 | 1114                    | 929                     | 357                  | 1.20           | (1.16-1.24)          | 735                 |
| Boston, MA                | 686                  | 827                     | 733                     | 391                  | 1.13           | (1.08-1.18)          | 133                 |
| Charlotte, NC             | 757                  | 975                     | 694                     | 475                  | 1.40           | (1.35-1.46)          | 498                 |
| Chicago, IL               | 780                  | 1027                    | 693                     | 540                  | 1.48           | (1.46-1.51)          | 3010                |
| Columbus, OH              | 900                  | 937                     | 918                     | 411                  | 1.02           | (0.99-1.06)          | 106                 |
| Dallas, TX                | 802                  | 1053                    | 770                     | 542                  | 1.37           | (1.33-1.41)          | 800                 |
| Denver, CO                | 770                  | 974                     | 740                     | 759                  | 1.32           | (1.25-1.39)          | 139                 |
| Detroit, MI               | 1012                 | 1055                    | 957                     | 601                  | 1.10           | (1.06-1.15)          | 583                 |
| El Paso, TX               | 768                  | 921                     | 841                     | 741                  | 1.10           | (0.98-1.22)          | 17                  |
| Fort Worth, TX            | 869                  | 1105                    | 877                     | 645                  | 1.26           | (1.21-1.31)          | 248                 |
| Houston, TX               | 860                  | 1157                    | 812                     | 698                  | 1.43           | (1.40-1.46)          | 1560                |
| Indianapolis, IN          | 895                  | 1028                    | 886                     | 322                  | 1.16           | (1.13-1.20)          | 303                 |
| Jacksonville, FL          | 900                  | 1032                    | 890                     | 549                  | 1.16           | (1.12-1.20)          | 310                 |
| Las Vegas, NV             | 1422                 | 1660                    | 1550                    | 979                  | 1.07           | (1.03-1.12)          | 64                  |
| Los Angeles, CA           | 647                  | 1113                    | 636                     | 530                  | 1.75           | (1.71-1.78)          | 1781                |
| Louisville, KY            | 880                  | 1046                    | 872                     | 302                  | 1.20           | (1.16-1.24)          | 232                 |
| Memphis, TN               | 948                  | 1139                    | 768                     | 324                  | 1.48           | (1.44-1.53)          | 1200                |
| Nashville, TN             | 866                  | 1039                    | 851                     | 348                  | 1.22           | (1.17-1.27)          | 251                 |
| New York, NY              | 633                  | 784                     | 601                     | 562                  | 1.31           | (1.29-1.32)          | 3392                |
| Oklahoma City, OK         | 844                  | 1079                    | 850                     | 643                  | 1.27           | (1.21-1.33)          | 158                 |
| Philadelphia, PA          | 918                  | 1060                    | 857                     | 648                  | 1.24           | (1.21-1.26)          | 1303                |
| Phoenix, AZ               | 734                  | 951                     | 742                     | 659                  | 1.28           | (1.21-1.35)          | 139                 |
| Portland, OR              | 874                  | 1048                    | 900                     | 579                  | 1.16           | (1.09-1.25)          | 51                  |
| San Antonio, TX           | 877                  | 1080                    | 912                     | 825                  | 1.18           | (1.13-1.24)          | 140                 |
| San Diego, CA             | 618                  | 899                     | 635                     | 531                  | 1.42           | (1.35-1.49)          | 199                 |
| San Francisco, CA         | 591                  | 1130                    | 647                     | 481                  | 1.75           | (1.66-1.83)          | 280                 |
| San Jose, CA              | 599                  | 896                     | 700                     | 494                  | 1.28           | (1.17-1.40)          | 46                  |
| Seattle, WA               | 677                  | 989                     | 685                     | 517                  | 1.44           | (1.36-1.53)          | 140                 |
| Washington, DC            | 792                  | 1007                    | 504                     | 426                  | 2.00           | (1.92-2.08)          | 1703                |
| <i>30 Cities Combined</i> | <i>762</i>           | <i>990</i>              | <i>752</i>              | <i>587</i>           | <i>1.32</i>    | <i>(1.311-1.324)</i> | <i>19744</i>        |
| <i>US Minus 30 Cities</i> | <i>770</i>           | <i>968</i>              | <i>780</i>              | <i>547</i>           | <i>1.24</i>    | <i>(1.237-1.244)</i> | <i>48642</i>        |

**eTable 2. (continued)**

|                           | 2013-2015            |                         |                         |                      |                |                      |                     |
|---------------------------|----------------------|-------------------------|-------------------------|----------------------|----------------|----------------------|---------------------|
| Location                  | Total Mortality Rate | NH Black Mortality Rate | NH White Mortality Rate | Other Mortality Rate | B:W Rate Ratio | Rate Ratio CI        | Excess Black Deaths |
| United States             | 761                  | 953                     | 774                     | 548                  | 1.23           | (1.228-1.234)        | 67392               |
| Austin, TX                | 721                  | 982                     | 723                     | 636                  | 1.36           | (1.29-1.44)          | 156                 |
| Baltimore, MD             | 1081                 | 1137                    | 1048                    | 445                  | 1.08           | (1.05-1.12)          | 417                 |
| Boston, MA                | 660                  | 736                     | 726                     | 405                  | 1.01           | (0.97-1.06)          | 29                  |
| Charlotte, NC             | 731                  | 948                     | 665                     | 489                  | 1.42           | (1.37-1.48)          | 578                 |
| Chicago, IL               | 765                  | 1024                    | 676                     | 538                  | 1.52           | (1.49-1.54)          | 3144                |
| Columbus, OH              | 883                  | 946                     | 901                     | 371                  | 1.05           | (1.02-1.09)          | 136                 |
| Dallas, TX                | 819                  | 1094                    | 777                     | 580                  | 1.41           | (1.37-1.45)          | 936                 |
| Denver, CO                | 749                  | 965                     | 729                     | 696                  | 1.32           | (1.26-1.39)          | 145                 |
| Detroit, MI               | 949                  | 991                     | 912                     | 519                  | 1.09           | (1.04-1.14)          | 518                 |
| El Paso, TX               | 744                  | 780                     | 821                     | 722                  | 0.95           | (0.85-1.06)          | -2                  |
| Fort Worth, TX            | 853                  | 1077                    | 884                     | 576                  | 1.22           | (1.17-1.27)          | 244                 |
| Houston, TX               | 905                  | 1189                    | 863                     | 770                  | 1.38           | (1.35-1.41)          | 1578                |
| Indianapolis, IN          | 898                  | 1050                    | 887                     | 393                  | 1.18           | (1.15-1.22)          | 354                 |
| Jacksonville, FL          | 875                  | 997                     | 877                     | 518                  | 1.14           | (1.10-1.17)          | 282                 |
| Las Vegas, NV             | 1403                 | 1656                    | 1536                    | 994                  | 1.08           | (1.04-1.12)          | 73                  |
| Los Angeles, CA           | 625                  | 1095                    | 621                     | 516                  | 1.76           | (1.73-1.80)          | 1804                |
| Louisville, KY            | 883                  | 1044                    | 875                     | 378                  | 1.19           | (1.15-1.24)          | 253                 |
| Memphis, TN               | 962                  | 1117                    | 795                     | 525                  | 1.40           | (1.36-1.45)          | 1135                |
| Nashville, TN             | 865                  | 1051                    | 843                     | 514                  | 1.25           | (1.20-1.29)          | 284                 |
| New York, NY              | 608                  | 746                     | 583                     | 540                  | 1.28           | (1.26-1.29)          | 3180                |
| Oklahoma City, OK         | 841                  | 1115                    | 852                     | 532                  | 1.31           | (1.25-1.37)          | 208                 |
| Philadelphia, PA          | 877                  | 1000                    | 830                     | 658                  | 1.20           | (1.18-1.23)          | 1134                |
| Phoenix, AZ               | 711                  | 884                     | 717                     | 661                  | 1.23           | (1.17-1.30)          | 135                 |
| Portland, OR              | 879                  | 1175                    | 901                     | 601                  | 1.30           | (1.22-1.39)          | 87                  |
| San Antonio, TX           | 880                  | 1093                    | 907                     | 832                  | 1.21           | (1.16-1.26)          | 169                 |
| San Diego, CA             | 605                  | 878                     | 635                     | 510                  | 1.38           | (1.32-1.45)          | 194                 |
| San Francisco, CA         | 559                  | 1086                    | 599                     | 468                  | 1.82           | (1.73-1.91)          | 284                 |
| San Jose, CA              | 565                  | 917                     | 662                     | 471                  | 1.39           | (1.27-1.51)          | 64                  |
| Seattle, WA               | 651                  | 1025                    | 652                     | 516                  | 1.57           | (1.48-1.67)          | 168                 |
| Washington, DC            | 767                  | 983                     | 484                     | 468                  | 2.03           | (1.95-2.12)          | 1764                |
| <i>30 Cities Combined</i> | <i>747</i>           | <i>969</i>              | <i>743</i>              | <i>579</i>           | <i>1.30</i>    | <i>(1.297-1.310)</i> | <i>19579</i>        |
| <i>US Minus 30 Cities</i> | <i>763</i>           | <i>950</i>              | <i>777</i>              | <i>540</i>           | <i>1.22</i>    | <i>(1.220-1.226)</i> | <i>49379</i>        |

**eTable 2. (continued)**

|                           | 2016-2018            |                         |                         |                      |                |                      |                     |
|---------------------------|----------------------|-------------------------|-------------------------|----------------------|----------------|----------------------|---------------------|
| Location                  | Total Mortality Rate | NH Black Mortality Rate | NH White Mortality Rate | Other Mortality Rate | B:W Rate Ratio | Rate Ratio CI        | Excess Black Deaths |
| United States             | 759                  | 960                     | 777                     | 539                  | 1.24           | (1.233-1.238)        | 74402               |
| Austin, TX                | 687                  | 980                     | 698                     | 563                  | 1.40           | (1.33-1.48)          | 181                 |
| Baltimore, MD             | 993                  | 1107                    | 870                     | 343                  | 1.27           | (1.23-1.31)          | 1003                |
| Boston, MA                | 632                  | 735                     | 666                     | 450                  | 1.10           | (1.06-1.15)          | 119                 |
| Charlotte, NC             | 729                  | 931                     | 678                     | 385                  | 1.37           | (1.33-1.42)          | 622                 |
| Chicago, IL               | 756                  | 1065                    | 644                     | 523                  | 1.65           | (1.62-1.68)          | 3804                |
| Columbus, OH              | 858                  | 975                     | 870                     | 323                  | 1.12           | (1.08-1.16)          | 279                 |
| Dallas, TX                | 795                  | 1092                    | 736                     | 590                  | 1.48           | (1.44-1.52)          | 1121                |
| Denver, CO                | 715                  | 918                     | 689                     | 683                  | 1.33           | (1.27-1.40)          | 147                 |
| Detroit, MI               | 984                  | 1048                    | 795                     | 670                  | 1.32           | (1.26-1.38)          | 1575                |
| El Paso, TX               | 735                  | 894                     | 847                     | 704                  | 1.05           | (0.95-1.18)          | 6                   |
| Fort Worth, TX            | 823                  | 1103                    | 831                     | 588                  | 1.33           | (1.28-1.38)          | 336                 |
| Houston, TX               | 895                  | 1226                    | 850                     | 734                  | 1.44           | (1.41-1.47)          | 1866                |
| Indianapolis, IN          | 911                  | 1068                    | 896                     | 451                  | 1.19           | (1.16-1.23)          | 413                 |
| Jacksonville, FL          | 894                  | 985                     | 926                     | 499                  | 1.06           | (1.03-1.09)          | 185                 |
| Las Vegas, NV             | 1342                 | 1718                    | 1462                    | 924                  | 1.18           | (1.13-1.22)          | 196                 |
| Los Angeles, CA           | 619                  | 1102                    | 605                     | 522                  | 1.82           | (1.78-1.86)          | 1962                |
| Louisville, KY            | 910                  | 1069                    | 902                     | 425                  | 1.19           | (1.15-1.23)          | 283                 |
| Memphis, TN               | 951                  | 1086                    | 786                     | 475                  | 1.38           | (1.34-1.43)          | 1166                |
| Nashville, TN             | 868                  | 1041                    | 849                     | 470                  | 1.23           | (1.18-1.27)          | 317                 |
| New York, NY              | 570                  | 718                     | 542                     | 504                  | 1.33           | (1.31-1.34)          | 3569                |
| Oklahoma City, OK         | 813                  | 1114                    | 811                     | 535                  | 1.37           | (1.31-1.44)          | 247                 |
| Philadelphia, PA          | 870                  | 1013                    | 827                     | 597                  | 1.22           | (1.20-1.25)          | 1307                |
| Phoenix, AZ               | 686                  | 938                     | 694                     | 612                  | 1.35           | (1.29-1.42)          | 207                 |
| Portland, OR              | 837                  | 1209                    | 849                     | 618                  | 1.42           | (1.34-1.52)          | 121                 |
| San Antonio, TX           | 866                  | 1105                    | 918                     | 802                  | 1.20           | (1.16-1.25)          | 178                 |
| San Diego, CA             | 592                  | 857                     | 622                     | 499                  | 1.38           | (1.32-1.45)          | 192                 |
| San Francisco, CA         | 537                  | 1102                    | 573                     | 455                  | 1.92           | (1.83-2.03)          | 294                 |
| San Jose, CA              | 549                  | 856                     | 654                     | 455                  | 1.31           | (1.20-1.42)          | 58                  |
| Seattle, WA               | 588                  | 945                     | 587                     | 484                  | 1.61           | (1.52-1.71)          | 165                 |
| Washington, DC            | 733                  | 993                     | 428                     | 402                  | 2.32           | (2.22-2.42)          | 2024                |
| <i>30 Cities Combined</i> | <i>724</i>           | <i>971</i>              | <i>717</i>              | <i>558</i>           | <i>1.35</i>    | <i>(1.347-1.361)</i> | <i>23064</i>        |
| <i>US Minus 30 Cities</i> | <i>764</i>           | <i>959</i>              | <i>782</i>              | <i>533</i>           | <i>1.23</i>    | <i>(1.223-1.229)</i> | <i>54827</i>        |

Abbreviations: NH, non-Hispanic; B:W, Black:White; CI, confidence interval

Notes: Mortality rates are shown per 100,000 population. The "Other" race/ethnic group includes all individuals other than those in the NH Black or NH White categories. Excess deaths represent the average number of additional Black deaths that occurred annually due to the higher Black mortality rate compared to the White rate. It is a weighted calculation, so the numbers for each city will not add up to the total for 30 cities combined, for example.
